# Supplementary material
Source: PubMed Central journal article supplement (PMC3015121)
Supplement: supp_tpc.110.073833_Supplemental_data_Tegeder.pdf [file supp_tpc.110.073833_Supplemental_data_Tegeder.pdf]

**A**

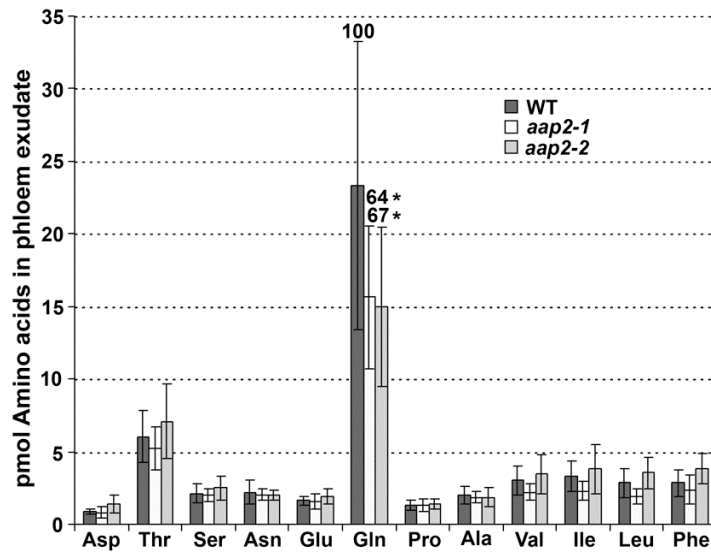

**B**

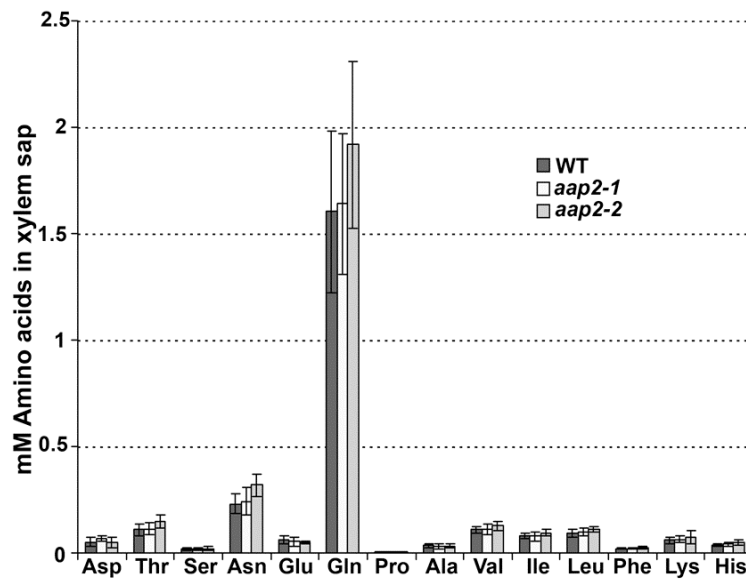

**Supplemental Figure 1. Amino Acid Concentrations and Composition in the Phloem Exudate and Xylem Sap of 6-Week Old *aap2* Plants.** Error bars depict standard deviation.

**(A)** Free amino acids in the phloem exudate ( $n = 8$ ).

**(B)** Free amino acids in the xylem sap ( $n = 10$ ).

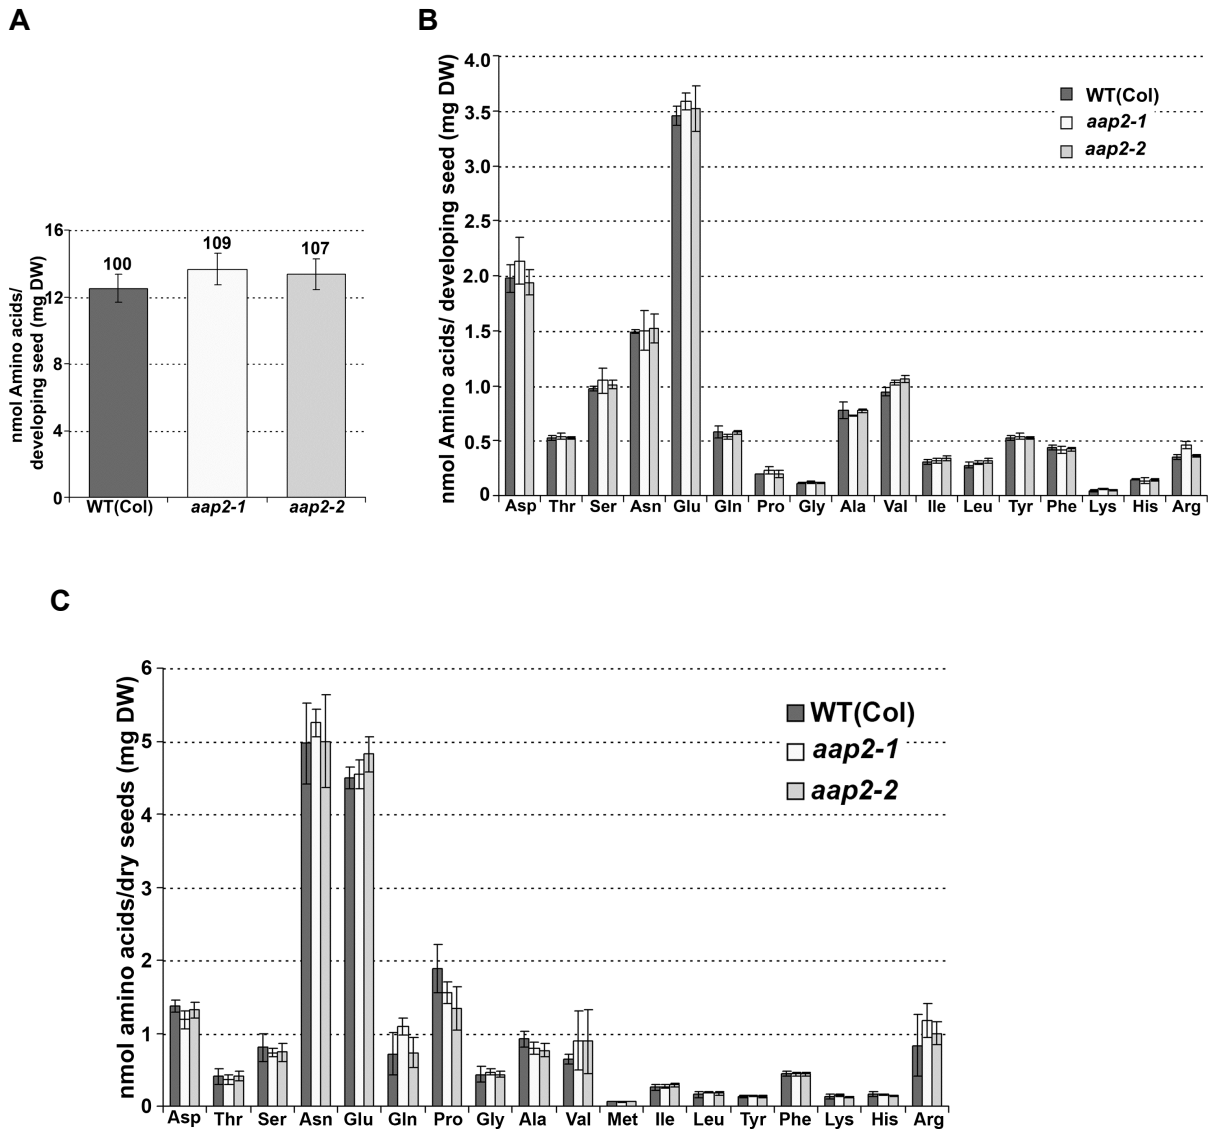

**Supplemental Figure 2. Amino Acid Levels in Developing and Desiccated Seeds.**

Error bars depict standard deviation.

**(A)** Total free amino acids in developing *aap2* seeds ( $n = 4$ ).

**(B)** Concentrations and composition of free amino acids in developing *aap2* seeds ( $n = 4$ ).

**(C)** Concentrations and composition of free amino acids in desiccated *aap2* seeds ( $n = 4$ ).

**A**

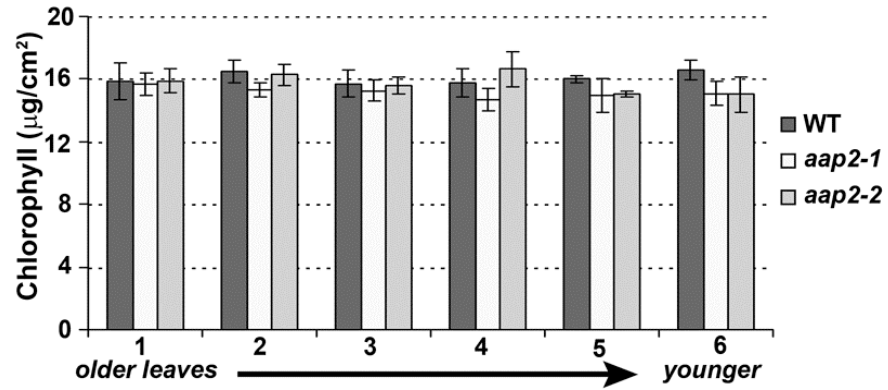

**B**

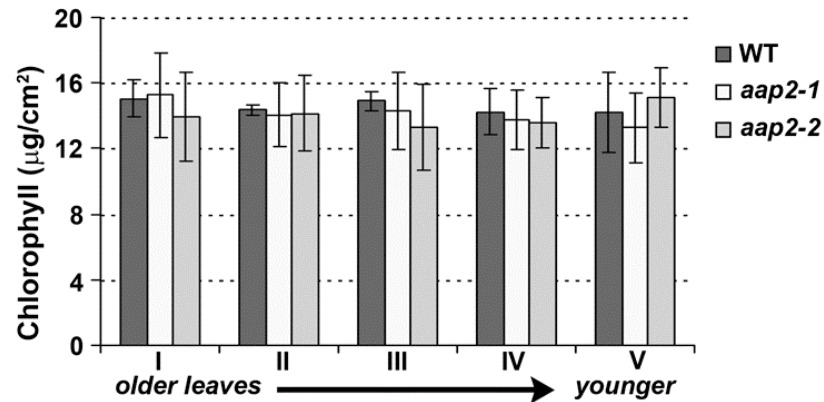

**Supplemental Figure 3. Leaf Chlorophyll Levels in Four and Six Week Old *aap2* Plants.** Error bars depict standard deviation.

**(A)** Four weeks old *aap2* and WT plants ( $n = 5$ ).

**(B)** Six weeks old *aap2* and WT plants ( $n = 5$ ).

**Supplemental Table 1. Overview of Primers Used for Expression Analyses of Genes of N and C Metabolism and Transport.**

| Genes              | Accession | Protein      | Function                                          | Primers used                                                                 | Literature                                   |
|--------------------|-----------|--------------|---------------------------------------------------|------------------------------------------------------------------------------|----------------------------------------------|
| <i>cPGM</i>        | At1g70730 | PGM          | phospho-glucumutase                               | F5'-CATGGGATTGAGTAAACTGATGATG-3'<br>R5'-CTGAAGTATGGTATGGCCCCAAC-3'           | Fettke et al., 2008                          |
| <i>AGPase mRNA</i> | At1g74910 | AGPase       | ADP glucose pyrophosphorylase                     | F5'-GCTGCTTCATTACACCGAGAAACC-3'<br>R5'-TTCCTCTGAGTAGAACATCTCTATG-3'          | Villand et al., 1993                         |
| <i>HXK3</i>        | At1g50460 | HXK3         | hexokinase 3                                      | F5'-ATTATCACGATCCAGATACGGTTGTTG-3'<br>R5'-ATGTCATACGAAGTTCTAGGCAAATGAG-3'    | Karve et al., 2008                           |
| <i>DPE2</i>        | At2g40840 | DPE2         | cytosolic transglucosidase                        | F5'-GTCAGATCAAGATGATTCAGTTGTTGTC-3'<br>F5'-CGACATAGTTGAGTCTAAGTCCATTTTC-3'   | Chia et al., 2004                            |
| <i>SPS4F</i>       | At4g10120 | SPS4F        | sucrose phosphate synthase                        | F5'-GATTGGATAAACAGTTACCTGGAAGC-3'<br>F5'-ATGGGACTAAACACCTTCTCTTGATG-3'       | Strand et al., 2000                          |
| <i>TPT</i>         | At5g46110 | TPT          | trioseP/ phosphate translocator                   | F5'-CTGCCATCATCGTTGAAGGTCCTAAAC-3'<br>R5'-ATCCAACCCAGAAGAGATCAGAGATG-3'      | Schneider et al., 2002                       |
| <i>pGlcT</i>       | At5g16150 | pGlcT        | plastidic glucose transporter                     | F5'-GATCCAGAGCGTTATGAGTTTCTTTG-3'<br>F5'-AAAGAGTATAGCACCAAGACAAGCAACAC-3'    | Weber et al., 2000                           |
| <i>MEX1</i>        | At5g17520 | MEX1         | plastidic maltose transporter                     | F5'-GAGCACTATTTATCCGTGATTTGATGTG-3'<br>F5'-CATCTCTCCACAAAGCCAGTCCATC-3'      | Niittyla et al., 2004                        |
| <i>TMT2</i>        | At4g35300 | TMT2         | vacuolar hexose transporter                       | F5'-TGGTTCTCTAGTAATGCTATGGTCTCC-3'<br>R5'-GTGAAGTGCAGTACCGTATTCAAC-3'        | Wormit et al., 2006                          |
| <i>VGT2</i>        | At5g17010 | VGT2         | vacuolar hexose transporter                       | F5'-GGTCTCAGTTGGACTGGCAATGC-3'<br>R5'-CTGTAAGACTACCGATTCCATAACCTCC-3'        | Aluri and Büttner, 2006                      |
| <i>SUC2</i>        | At1g22710 | SUC2         | sucrose transporter                               | F5'-GGTGTCTGAATCTAGCCATTGTCG-3'<br>R5'-GTCAACGCCAATACCCACTTACC-3'            | Sauer and Stolz, 1994                        |
| <i>SUT2/SUC3</i>   | At2g02860 | SUT2/SUC3    | sucrose transporter                               | F5'-GACGACCATTTATTCTAGTTGGATCATTTC-3'<br>R5'-GCAATGTTCTTTGAATCTCCTAACAG-3'   | Barker et al., 2000<br>Meyer et al., 2004    |
| <i>SUT4/SUC4</i>   | At1g09960 | SUT4/SUC4    | sucrose transporter                               | F5'-ACTTCATATAGTGCTGGGGTCAGTATG-3'<br>R5'-TTATCATTTCCAAGAAAGCAAATAGCC-3'     | Weise et al., 2000                           |
| <i>SUC5</i>        | At1g71890 | SUC5         | sucrose transporter                               | F5'-CGGCGGTGGAACCTACCTTC-3'<br>R5'-GAATCCCATAGCCCCTGACATG-3'                 | Baud et al., 2005                            |
| <i>AAP1</i>        | At1g58360 | AAP1         | amino acid transporter                            | F5'-GCATCGCTGTCCACCTTATTG-3'<br>R5'-CTTGTTGTCTGGATAGTTTCTGTTGC-3'            | Hirner et al., 1998;<br>Sanders et al., 2009 |
| <i>AAP2</i>        | At5g09220 | AAP2         | amino acid transporter                            | F5'-GGTCGCTTTCCGCATCATTACTTACTAC-3'<br>R5'-CAAGCATCACTCCGGCGATTGATCC-3'      | Hirner et al., 1998                          |
| <i>AAP8</i>        | At1g10010 | AAP8         | amino acid transporter                            | F5'-GGTCGCTTTCCGCATCATTACTTACTAC-3'<br>R5'-GTAACCAATAGTGACCCCTACGAGATTCAC-3' | Schmidt et al., 2007                         |
| <i>LHT1</i>        | At5g40780 | LHT1         | amino acid transporter                            | F5'-ATTAGCAGCAGCAGACAAAAAGAG-3'<br>R5'-TAGTGTATGACCCATGACAAAACCAAC-3'        | Chen and Bush, 1997                          |
| <i>ANT</i>         | At3g30390 | ANT          | aromatic neutral amino acid transporter           | F5'-GCTGCTATTCTTCTGATTACTTCTTG-3'<br>R5'-ATAATGAGAAACACAACC GCCAGAG-3'       | Carter et al., 2004                          |
| <i>CAT2</i>        | At1g58030 | CAT2         | cationic amino acid transporter                   | F5'-ATGGGGTTTTTGGTGGATACGC-3'<br>R5'-GAGGAACAGTGAGGGCTTAGCAAG-3'             | Su et al., 2004                              |
| <i>PTR2</i>        | At2g02040 | PTR2         | peptide transporter                               | F5'-TACAACAAGAAATGGGCAAGAAGGTTG-3'<br>R5'-GCTTATACCTAGCAGCAGAGAAGAAGTAAAC-   | Steiner et al., 1994<br>Carter et al., 2004  |
| <i>KASI</i>        | At5g46290 | KASI         | $\beta$ -ketoacyl-acyl carrier protein synthase I | F5'-ACTGGTATGGGTCTCGTCTCTGTG-3'<br>R5'-TTCAAACAATCATCAAGCCTACGC-3'           | Olsen et al., 2004                           |
| <i>FAE1</i>        | At4g34520 | FAE1         | fatty acid elongation 1                           | F5'-GCGGGGACAACACTTACGAAAAATATAG-3'<br>R5'-GTTTCTTGGCGACGAAGGTAGCG-3'        | James et al., 1995                           |
| <i>FAD2</i>        | At3g12120 | FAD2         | fatty acid desaturase 2                           | F5'-GGTTGCGTTGCCATTTCTTCCC-3'<br>R5'-GCATCACTATCAGAAGCGGTACTCC-3'            | Covello and Reed, 1996                       |
| <i>FAD3</i>        | At2g29980 | FAD3         | fatty acid desaturase 3                           | F5'-TCCTCTACTGAATAGTGTGGTTGGTCAC-3'<br>R5'-GGACAGTGTATCTGAGCATCCGAGTAC-3'    | Browse et al., 1993                          |
| <i>2S1</i>         | At4g27140 | 2S albumin   | albumin storage protein                           | F5'-GAAGAAGATGACGCCACTAACCC-3'<br>R5'-GCTGTTGTTCTGCTGTTGTCCC-3'              | Guerche et al., 1990                         |
| <i>CRU3</i>        | At4g28520 | 12S globulin | globulin storage protein                          | F5'-GCTATACCTTGCCCATCTTGGAGTATG-3'<br>R5'-GTTGATTTAGGAAGCACCATCGCATTAC-3'    | Pang et al., 1988                            |
